# Supplementary material for: Plasmonic nano-necklace arrays via reconstruction of diblock copolymer inverse micelle nanotemplates
Source: Royal Society of Chemistry journal article supplement (doi:10.1039/c0sm00972e), 2010-10-26
Supplement: c0sm00972e.pdf [file c0sm00972e.pdf]

## Supporting Information

### Plasmonic nano-necklace arrays via reconstruction of diblock copolymer inverse micelle nanotemplates

Ji Yong Lee,<sup>a</sup> Jieun Lee,<sup>a</sup> Yu Jin Jang,<sup>a</sup> Juyon Lee,<sup>a</sup> Yoon Hee Jang,<sup>a</sup> Saji Thomas Kochuveedu,<sup>a</sup> Sang Soo Lee,<sup>b</sup> and Dong Ha Kim<sup>a\*</sup>

<sup>a</sup>*Department of Chemistry and Nano Science, Division of Molecular and Life Sciences, College of Natural Sciences, Ewha Womans University, 11-1 Daehyun-dong, Seodaemun-gu, Seoul, 120-750, Korea*

<sup>b</sup>*Polymer Hybrid Research Center, Korea Institute of Science and Technology, P.O. Box 131, Cheongryang, Seoul 130-650, Korea*

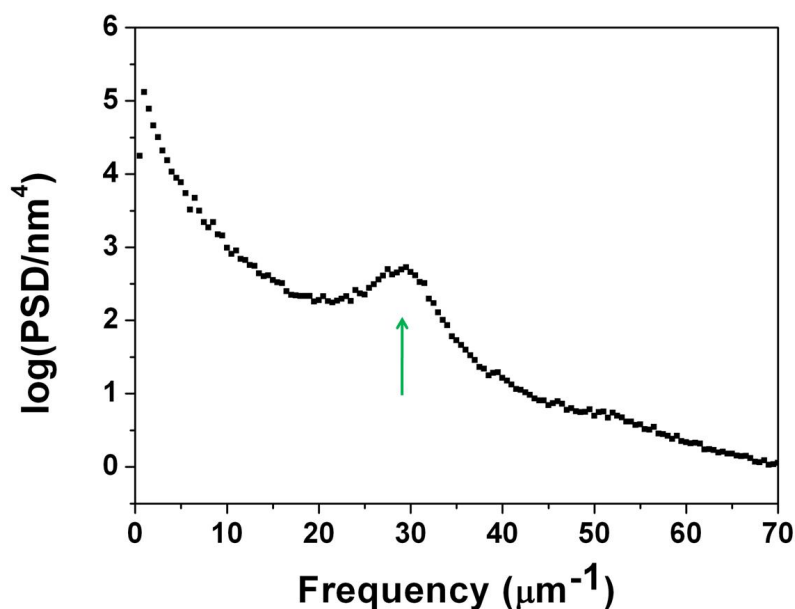

**Figure S1.** Power spectral density profile calculated from the AFM images in Fig.1a.

In order to evaluate the average spacing between the two neighboring nanodots, we obtained a power spectral density profile converted from the quasi-hexagonal arrays in the raw AFM image (Figure 1a). As shown in Figure S1, it is evident that the first order peak is distinctly observed, indicating that the nanodots are regularly spaced throughout the entire surface of the film. The spacing thus obtained was measured to be  $\sim 35$  nm.
